# Supplementary material
Source: Springer Nature journal article supplement (https://www.springermedizin.de/resource/supplementary/13063_2013_1422_MOESM1_ESM.pdf/9620010)
Supplement: MOESM1 [file 9620010]

Gynecological Facilities in the City

**recruit participants**

- check eligibility and exclusion criteria
- introduce the coordinating office

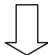

Coordinating Office

(Tsukuba University of Technology)

- informed consent
- registration
- randomized allocation

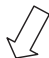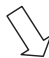

**Anma-massage therapy group**

Measurement-A

First Anma-massage session

Measurement-B

- 
- 40-min Anma-massage session once weekly for 2 months
- 
- 
- 

Measurement-C

Last (8<sup>th</sup>) Anma-massage session

**No Anma-massage group**

Measurement-D

Relaxing chat session

Measurement-E

Measurement-F

Anma-massage session

Measurement-G
